# Supplementary material for: Fast splice site detection using information content and feature reduction
Source: PubMed Central journal article supplement (PMC2638148; doi:10.1186/1471-2105-9-s12-s8), 2008-12-12
Supplement: 1471-2105-9-S12-S8-S1.pdf [file 1471-2105-9-S12-S8-S1.pdf]

## Additional file 1

Table S1

### AUC and SVM parameters for different models for NN269 acceptor splice sites

| Model                                          | SVM kernel | AUC           | SVM Parameters  |
|------------------------------------------------|------------|---------------|-----------------|
| Reduced MM1 SVM<br>(Best in terms of accuracy) | GRBF       | <b>0.9741</b> | Sigma = 2, C=10 |
| Reduced MM1 SVM                                | Polynomial | 0.9695        | Order = 2, C=10 |
| MM1 SVM [18]                                   | Polynomial | 0.9674        | Order = 2, C=10 |
| MM1 SVM                                        | GRBF       | 0.9695        | Sigma = 1, C=10 |
| IC Shapiro SVM<br>(Best In terms of Time)      | Polynomial | <b>0.9628</b> | Order = 2, C=10 |

### AUC and SVM parameters for different models for NN269 donor splice sites

| Model                                          | SVM kernel | AUC           | SVM Parameters  |
|------------------------------------------------|------------|---------------|-----------------|
| Reduced MM1 SVM<br>(Best in terms of accuracy) | GRBF       | <b>0.9790</b> | Sigma = 1, C=10 |
| Reduced MM1 SVM                                | Polynomial | 0.9764        | Order = 2, C=10 |
| MM1 SVM [18]                                   | Polynomial | 0.9761        | Order = 2, C=10 |
| MM1 SVM                                        | GRBF       | 0.9780        | Sigma = 1, C=10 |
| IC Shapiro SVM<br>(Best In terms of Time)      | Polynomial | <b>0.9665</b> | Order = 2, C=10 |
