# Supplementary material for: Fast splice site detection using information content and feature reduction
Source: PubMed Central journal article supplement (PMC2638148; doi:10.1186/1471-2105-9-s12-s8), 2008-12-12
Supplement: 1471-2105-9-S12-S8-S2.pdf [file 1471-2105-9-S12-S8-S2.pdf]

## Additional file 2

### Additional text – Relationship between $R_{iw}(b,l)$ and $R_{sequence}(l)$ :

The individual information content of each individual splice site was calculated using the following equation [29, 30]:

$$R_{sequence}(l) = 2 + \sum_{b \in A,C,G,T} f(b,l) \log_2 f(b,l) \quad (2)$$

where,  $f(b,l)$  is the probability of nucleotide  $b$  at position  $l$ . To calculate the information content ( $R_i, bits$ ) of each splice site, at first, an individual information weight matrix is generated from the frequencies of each nucleotide at each position. The individual information weight matrix  $R_{i,w}(b,l)$  can be calculated from the following equation [29, 30]:

$$R_{i,w}(b,l) = 2 + \log_2 f(b,l) \quad (3)$$

The information content of each splice site was calculated by summing up  $R_{i,w}(b,l)$  at each position of the splice site sequences. The relationship between  $R_{i,w}(b,l)$  and  $R_{sequence}(l)$  is discussed below.

In a set of aligned sequences the  $jth$  sequence is represented by a matrix  $s(b,l,j)$ , where  $b$  is the base at position  $l$ . The individual information of sequence  $j$  is the dot product between the sequence and the weight matrix  $R_{i,w}(b,l)$  as given below:

$$R_i(j) = \sum_l \sum_{b=A}^T s(b,l,j) R_{iw}(b,l) \quad (4)$$

The frequency matrix  $f(b,l)$  is created by aligning  $n$  individual sequences and given by:

$$f(b,l) = \frac{1}{n} \sum_{j=1}^n s(b,l,j) \quad (5)$$

As the frequencies also sum to one, we can write:

$$\sum_{b=A}^T f(b,l) = 1 \quad (6)$$

The mean information content of  $n$  sequences used to create the frequency matrix  $f(b,l)$  is given by:

$$E(R_i) = \frac{1}{n} \sum_{j=1}^n R_i(j) \quad (7)$$

From equation (3) and (4) we get:

$$R_i(j) = \sum_l \sum_{b=A}^T s(b,l,j) [2 + \log_2 f(b,l)] \quad (8)$$

From equation (7) and (8) we get:

$$E(R_i) = \frac{1}{n} \sum_{j=1}^n \sum_l \sum_{b=A}^T s(b, l, j) [2 + \log_2 f(b, l)] \quad (9)$$

From equation (5) and (9) we get:

$$\begin{aligned} E(R_i) &= \sum_l \sum_{b=A}^T f(b, l) [2 + \log_2 f(b, l)] \quad (10) \\ &= \sum_l \sum_{b=A}^T 2f(b, l) + \sum_l \sum_{b=A}^T f(b, l) \log_2 f(b, l) \end{aligned}$$

From equation (6) and (10) we get:

$$E(R_i) = \sum_l 2 + \sum_l \sum_{b=A}^T f(b, l) \log_2 f(b, l) \quad (11)$$

The right hand side of equation (11) is similar to that of  $R_{sequence}(l)$  in equation (2). Hence, it can be deduced that the average of individual information content is the average information content of the sites.
